# Supplementary material
Source: PubMed Central journal article supplement (PMC6705042)
Supplement: ao9b01033_si_001.pdf [file ao9b01033_si_001.pdf]

*Supporting Information*

**Electrophysiological Analysis of Antimicrobial Peptides in Diverse Species**

Naoki Saigo, Kayano Izumi and Ryuji Kawano\*

*Department of Biotechnology and Life Science, Tokyo University of Agriculture and  
Technology (TUAT), 2-24-16 Naka-cho Koganei-shi Tokyo 184-8588 Japan*

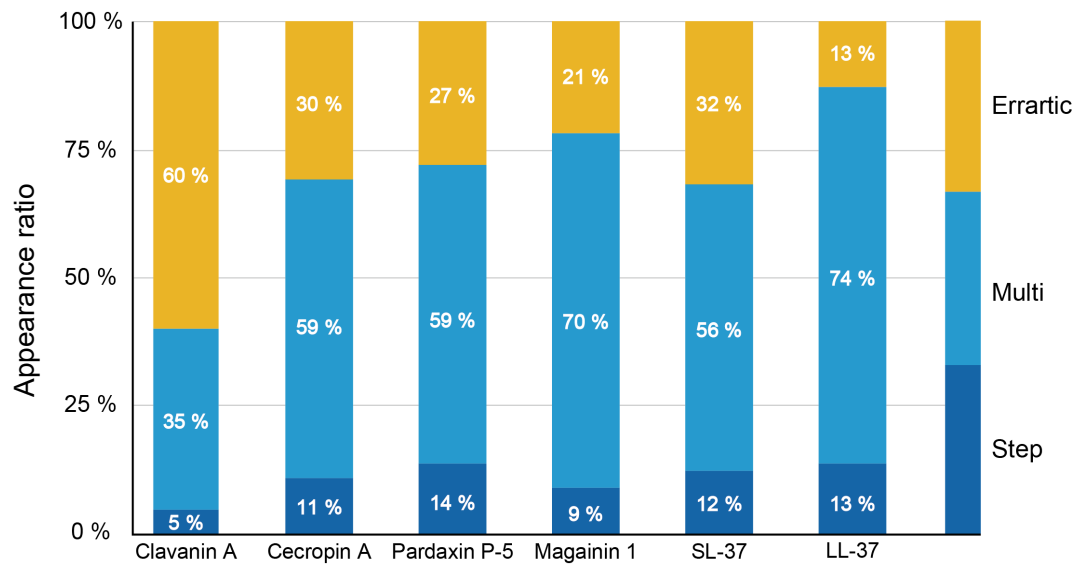

**Figure S1.** Signal classification of six AMPs. (All standardized  $n = 243$ ).

(a) Step-like

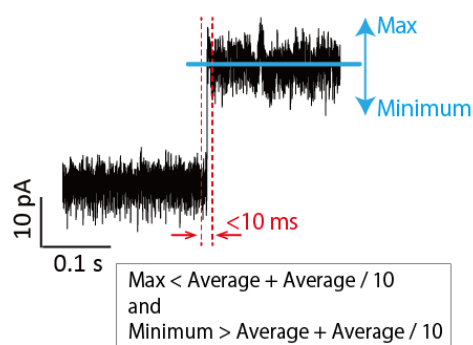

(b) Multi-level

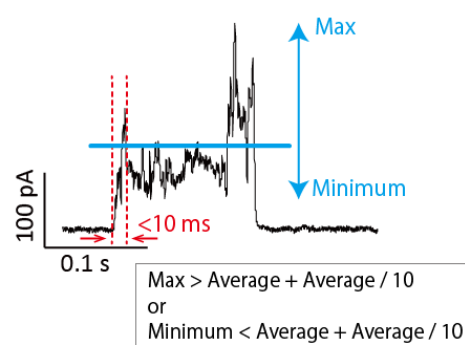

(c) Erratic

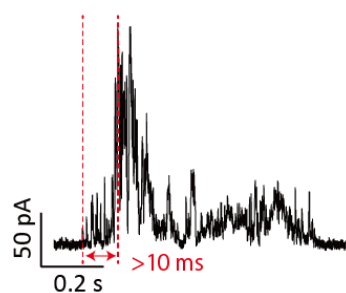

(d) Spike

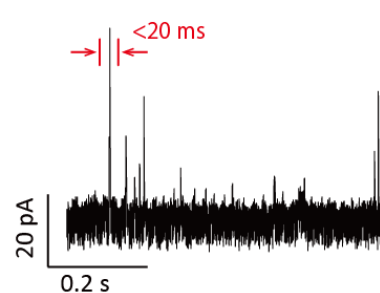

**Figure S2.** Definition for the classification of current signals: a) step-like, b) multi-level, c) erratic, and d) spike. These typical signals were obtained from magainin 1 or LK peptides, as referred from Sekiya *et al Analyst* **2018** (Ref. 24).

**Table S1.** Four parameters of pore-forming activities of each AMP.

|                          | Clavanin<br>A | Cecropin<br>A | Pardaxin<br>P5 | Magainin<br>1 | SL-37     | LL-37     |
|--------------------------|---------------|---------------|----------------|---------------|-----------|-----------|
| Pore stability<br>(%)    | 40            | 70            | 72             | 80            | 64        | 85        |
| Pore<br>diameter<br>(nm) | 1.7 ± 0.3     | 1.1 ± 0.1     | 1.8 ± 0.1      | 1.6 ± 0.1     | 0.9 ± 0.1 | 1.9 ± 0.2 |
| CF<br>(pC/s)             | 124 ± 34      | 139 ± 20      | 223 ± 29       | 166 ± 20      | 87 ± 14   | 166 ± 20  |
| Pore forming<br>activity | 47            | 1.2           | 1.4            | 11            | 10        | 5.7       |
